# Supplementary material
Source: publisher figshare collection journal article supplement (https://geolsoc.figshare.com/ndownloader/files/25728040)
Supplement: Supplementary file 1 [file 25728040]

## Sheet: Table S1
Table S1. Major element, trace element and isotopic (Sr, Nd, Pb, Hf) compositions of Cenozoic volcanic rocks within the Marie Byrd Land Volcanic Group (MBLVG).
Volcanic Province	Marie Byrd Land Volcanic Province
Volcanic Field	Fosdick Mountains Volcanic Field																							Flood Range Volcanic Field
Volcanic Center	Perkins	Avers	Avers	Perkins	Perkins	Perkins	Perkins	Perkins	Perkins	Perkins	Perkins	Perkins	Perkins	Perkins	Perkins	Recess N.	Recess N.	Recess N.	Perkins	Perkins	Perkins	Perkins	"F5"	Berlin	Berlin	Berlin	Berlin	Berlin	Berlin	Berlin	Berlin	Berlin	Berlin	Berlin	Berlin	Berlin	Berlin	Berlin	Berlin	Berlin	Berlin	Berlin	Berlin	Berlin	Berlin	Berlin	Berlin	Berlin	Berlin
satellite center/outcrop
Sample number	WCM90-207	Avers-1	Avers-2	P-12-12-1	P-12-12-2	P-12-12-3	P-12-12-4	P-12-12-5	P-12-12-6	P-12-12-7	P-12-12-8	P-12-12-9	P-12-12-10	P-12-12-11	P-12-12-12	R-1	R-2	R-3	01212-Pk2	66D-27	66D-28	66D-30	66D-91	WCM93-001	WCM93-04	WCM93-008	WCM93-009	WCM93-010	WCM93-011	WCM93-014	WCM93-015	WCM93-016	WCM93-022	WCM93-023	WCM93-037	WCM93-053	WCM93-069	WCM93-079	WCM93-097	WCM93-115	WCM93-121	WCM93-124	WCM93-125	WCM93-126	WCM93-127	WCM93-128	WCM93-130	WCM93-133	WCM93-134
longitude (°W)‡	-144.15	-145.379	-145.379	-144.15	-144.15	-144.15	-144.15	-144.15	-144.15	-144.15	-144.15	-144.15	-144.15	-144.15	-144.15	-144.37	-144.37	-144.37	-144.13	-144.15	-144.15	-144.15	-144.92	-135.9	-135.9	-135.9	-135.9	-135.9	-135.9	-135.9	-135.9	-135.9	-135.9	-135.9	-135.9	-135.9	-135.9	-135.9	-135.9	-135.9	-135.9	-135.9	-135.9	-135.9	-135.9	-135.9	-135.9	-135.9	-135.9
Latitude (°S)‡	-76.51	-76.48	-76.48	-76.51	-76.51	-76.51	-76.51	-76.51	-76.51	-76.51	-76.51	-76.51	-76.51	-76.51	-76.51	-76.5	-76.5	-76.5	-76.53	-76.51	-76.51	-76.51	-76.45	-76	-76	-76	-76	-76	-76	-76	-76	-76	-76	-76	-76	-76	-76	-76	-76	-76	-76	-76	-76	-76	-76	-76	-76	-76	-76
age*	1.4																				3.4	4.5		0.21	0.216	0.21	0.597	2.8	0.234	2.71	0.0249	0.0104	0.0279	0.0259	2.86	2.76					2.79		0.58	0.572	0.46	0.1862	0.1433	0.1869	0.456
error (2 s)	0.05																				0.6	1		0.031	0.022	0.08	0.028	0.11	0.011	0.07	0.0029	0.0053	0.0037	0.0039	0.24	0.09					0.12		0.015	0.009	0.0411	0.0046	0.0057	0.0091	0.175
Major elements (wt.%)
SiO2	48.53	43.205	43.01	48.98	48.535	48.46	49.06	48.49	48.56	48.45	48.33	48.23	48.33	47.94	48.29	44.48	44.84	43.83	48.6	47.55	47.8	47.99	49.27	44.89	45.89	48.77	60.05	58.6475	65.56	49.58	61.73	61.12	60.96	61.72	58.18	58.29	58.05	58.3	58.39	58.6	58.52	60.13	59.37	59.48	61.89	63.445	61.66	62.82	58.54
TiO2	2.37667	2.733	2.731	2.409	2.2445	2.434	2.457	2.3	2.359	2.397	2.271	2.465	2.459	2.361	2.332	2.849	2.948	2.982	2.367	2.32	2.15	2.27	1.92	3.04	2.9	2.44	0.63	0.08	0.325	2.07667	0.52	0.53	0.61	0.56	0.18	0.28	0.3	0.31	0.29	0.25	0.22	0.93	0.53	0.52	0.42	0.425	0.41	0.48	0.55
Al2O3	14.55	13.11	12.95	14.58	14.31	14.96	14.65	14.41	14.38	14.06	14.29	14.29	14.18	14.22	14.17	13.1	13.52	13.25	14.58	13.28	13.32	13.61	13.82	15.21	15.55	15.6	16.75	19.1675	15.36	16.67	13.48	15.77	14.4	13.94	17.76	17.46	17.24	17.39	17.3	17.58	17.7	15.35	16.52	16.56	15.4	14.5	13.28	14.66	15.91
Fe2O3	12.59																			3.11	1.94	3.33	1.02	13.93	13.74	12.33	8.07	5.0075	5.29	13.1767	9.65	9.03	9.25	9.65	6.68	7.78	7.86	7.99	7.82	7.53	7.17	9.24	8.75	8.78	8.02	7.565	9.01	7.85	9.32
FeO		12.113	12.301	10.841	11.0885	11.224	10.948	11.206	11.318	12.055	11.609	11.998	12.12	11.976	11.901	12.394	12.897	12.787	11.824	7.83	8.13	7.68	9.52
MnO	0.166667	0.194	0.193	0.161	0.166	0.166	0.162	0.169	0.169	0.171	0.162	0.17	0.171	0.167	0.168	0.175	0.185	0.183	0.167	0.16	0.17	0.16	0.15	0.22	0.22	0.22	0.25	0.15	0.155	0.253333	0.29	0.3	0.31	0.31	0.18	0.21	0.22	0.22	0.22	0.21	0.2	0.28	0.27	0.27	0.25	0.235	0.29	0.25	0.26
MgO	8.23667	11.71	11.9	8.07	9.02	7.61	7.85	8.84	8.52	8.35	8.71	7.9	7.95	8.16	8.54	10.26	7.75	9.52	7.28	7.77	8.43	7.56	9.03	7.5	6.73	6.11	0.29	0.2725	0.05	2.80333	0	0.14	0.03	0	0.06	0.21	0.29	0.14	0.16	0.16	0.21	0.52	0.25	0.31	0	0.095	0	0	0.34
CaO	9.27333	10.29	10.26	9.58	9.5	9.34	9.58	9.54	9.44	9.33	9.55	9.38	9.32	9.41	9.47	9.01	9.45	9.49	9.54	10.23	9.83	9.91	9.12	9.53	8.8	8.14	2.09	0.7175	0.98	6.46667	1.12	2.05	1.78	1.35	1.56	2.03	2.08	2.1	2.05	2.01	1.84	2.31	2.26	2.27	1.54	1.175	0.86	1.37	2.47
Na2O	3.59333	4.055	3.6	3.49	3.305	3.91	3.55	3.36	3.46	3.45	3.35	3.54	3.57	3.41	3.39	4.33	4.48	4.24	3.54	3.41	3.26	3.22	3.19	4.27	4.61	4.63	6.71	9.2775	6.92	5.65	8.46	6.71	7.63	8.41	8.32	7.53	7.56	7.7	8.02	7.81	7.93	6.84	7.36	7.44	8	7.53	9.65	7.63	7.22
K2O	0.75	1.2	1.38	0.74	0.72	0.72	0.74	0.69	0.72	0.74	0.7	0.76	0.76	0.72	0.71	1.94	1.89	1.89	0.73	0.74	0.78	0.74	0.52	1.47	1.76	1.84	5.04	5.12	5.14	2.07	4.56	4.36	4.66	4.59	4.88	4.69	4.49	4.64	4.55	4.72	4.86	4.59	4.51	4.51	4.74	4.855	4.43	4.75	4.44
P2O5	0.34	0.6715	0.66	0.377	0.3445	0.399	0.375	0.359	0.371	0.38	0.344	0.384	0.387	0.367	0.361	0.769	0.795	0.811	0.37	0.37	0.35	0.35	0.26	0.78	0.83	0.73	0.15	0.0225	0.015	1.1	0.04	0.1	0.07	0.04	0.06	0.07	0.1	0.1	0.1	0.07	0.05	0.22	0.16	0.15	0.04	0.035	0.02	0.03	0.21
Total	100.407	99.2815	98.985	99.228	99.2335	99.223	99.372	99.364	99.297	99.383	99.316	99.117	99.247	98.731	99.332	99.307	98.755	98.983	98.998	96.77	96.16	96.82	97.82	100.84	101.03	100.81	100.03	98.4625	99.795	99.8467	99.85	100.11	99.7	100.57	97.86	98.55	98.19	98.89	98.9	98.94	98.7	100.41	99.98	100.29	100.3	99.86	99.61	99.84	99.26
CIPW normatives (wt.%)
nepheline	-	14.3313	12.6212	-	-	0.936369	-	-	-	-	-	-	-	-	-	13.6299	12.8503	13.934	-	0.578849	-	-	-	9.9396	10.0828	5.49888	3.92835	17.4918	-	6.14229	-	-	-	-	14.0104	10.4179	10.0867	11.0792	12.1076	11.5381	12.5336	2.32435	6.93639	7.36249	1.26295	-	-	-	6.95412
olivine	-	-	-	-	-	-	-	-	-	-	-	-	-	-	-	-	-	-	-	-	-	-	-	-	-	-	-	-	4.68795	-	1.8994	-	-	0.298087	-	-	-	-	-	-	-	-	-	-	-	2.68519	2.04375	1.27956	-
diopside	18.0742	26.1205	25.2673	18.5814	18.392	18.2198	18.6268	18.3183	18.3901	18.6717	18.7799	18.7932	18.839	18.6339	18.8082	23.3124	24.7412	24.3723	18.8468	24.6543	22.7705	21.9575	18.06	19.4684	17.4922	15.5667	7.6817	3.07505	4.22629	9.23106	4.76563	8.45812	7.53562	5.75057	6.71014	8.66846	8.72061	8.80686	8.57664	8.56306	7.91976	8.78722	9.03918	9.0956	6.60075	4.99864	3.72936	5.93073	9.73288
hypersthene	1.53009	-	-	4.93789	4.01046	-	4.59608	3.5712	3.11793	3.21487	2.66323	1.44556	1.421	2.20086	2.58195	-	-	-	3.47456	-	0.447523	5.92691	9.00933	-	-	-	-	-	3.38448	-	9.86745	0.148094	2.02279	9.1586	-	-	-	-	-	-	-	-	-	-	-	6.71933	9.7401	6.2886	-
quartz	-	-	-	-	-	-	-	-	-	-	-	-	-	-	-	-	-	-	-	-	-	-	-	-	-	-	-	-	4.68795	-	1.8994	-	-	0.298087	-	-	-	-	-	-	-	-	-	-	-	2.68519	2.04375	1.27956	-
Trace elements (ppm)
Sc	23.39	24.5	23	20	26	27	23	24	23	25	28	18	30	24	26	16	24	20	27
V	186.667	236	245	216	191	204	201	203	197	206	200	209	211	199	199	216	224	231	196	202	184	193	166	183	158	110	1		1	14				3								1	4	4		2	1	2	0
Cr	217	363	325	210	252	164	199	219	215	209	234	189	190	225	243	273	263	296	206	233	262	248	355	178	129	140	3	13.5	11	12		2			16	24	25	11	18	14	11		3	2	3	6.5			13
Ni	149.667	261	263	158	186.5	136	156	177	166	165	180	148	155	161	172	226	244	215	151	140	162	145	156	109	85	85	2	1		7	6	5	6	6		4	3					5	4	3	3	4	7	2	4
Cu	61.6667	46.5	54	56	54.5	50	60	55	57	57	55	57	56	55	53	39	44	38	54					54	50	44	9	7	7	18.3333	8	9	9	8								9	9	10	8	7	9	6
Zn	104	115.5	106	103	102	102	102	103	106	106	98	105	108	105	101	115	146	117	103					95	99	103	129	181.75	169	131.333	280	180	175	265	161	153	150	147	151	153	158	145	147	147	137	218.5	372	199	139
Ga	21	20	20	20	20	24	19	22	22	18	20	22	20	17	18	23	21	22	20					15	22	21	26	37.25	37.5	24	41	32	32	39	33	30	28	31	30	31	31	31	28	33	34	36	45	34	34
Rb	14.3333	28.7255	28.7974	11.1181	9.88626	9.36704	10.3529	7.73562	11.2767	11.8352	9.14557	11.9183	12.0025	10.9219	10.6819	42.8786	41.8486	40.7838	11.4875	11	13	11	11	34	36	35	74	136.5	193.5	34.6667	120	60	70	110	87	76	62	78	69	78	78	85	89	88	111	109.5	212	95	85
Sr	502.667	838	829	496	470	527	493	483	479	475	489	486	485	487	482	962	1033	1006	498	515	482	498	425	821	873	755	73	2.75	6	786.667	10	153	12	12	44	160	147	126	116	97	74	102	177	181	7	7	4	10	194
Y	27.6667	26.603	26.1986	26.602	25.4747	22.9449	25.4435	24.8446	25.4222	26.6931	24.2465	27.2918	27.1369	25.5345	25.5387	24.8749	27.0216	26.0143	25.9979	27	8	29	24	37	37	37	49	76.5	91	48.6667	104	64	57	92	68	59	56	58	58	62	66	62	66	67	71	78.5	173	72	63
Zr	143.333	235	222	137	125	143	135	128	134	138	128	141	141	133	133	284	289	292	136	144	131	140	110	302	330	277	554	1311	1074.5	411.333	1102	510	557	995	936	807	785	787	796	834	879	651	773	786	817	761	1979	671	806
Nb	25	65.6	62.2	26.4	24.1	27.9	25.1	25.3	25.6	26.4	24.9	26.9	27.6	25.1	26.3	74.9	77.8	79.8	25.6	26	23	25	12	65	71	54	90	199.25	153.5	80.3333	184	86	95	164	189	157	153	153	155	162	173	100	114	114	145	119	307	103	130
Cs	0.14	0.339727	0.357709	0.118558	0.107963	0.113905	0.194146	0.0628293	0.120775	0.129043	0.0624465	0.112075	0.126748	0.103863	0.0886012	0.836922	0.782094	0.721356	0.0982859
Ba	201	426.5	401	199	186	202	191	186	189	193	184	196	195	199	194	487	505	490	197	266	294	278	211	409	459	833	969	7.25	13.5	568	81	1417	465	207	800	1458	1492	1505	1464	1325	1144	1519	946	971	151	196	16	305	1235
La	18.6	47.4042	45.3275	19.8043	18.1667	18.4679	18.7414	18.4369	18.8007	19.7255	17.5228	20.074	20.0884	18.6775	18.7092	51.3458	53.9981	53.6829	18.984	21	22	23	16	48.45	45	45	67	145	105	67	114	86	64	126								83	104	98	108	43	245	95
Ce	37.9	84.8534	81.1526	37.6124	34.8565	34.6376	35.7798	35.3251	35.9363	37.7269	33.4441	38.3665	38.3222	35.6216	35.6821	94.0717	98.7878	97.7694	36.3593	28	32	43	25	105	115	96	162	288	281	135	333	187	192	301								184	215	236	245	127.5	588	234
Pr		9.36521	9.02644	4.45869	4.16376	4.0954	4.23238	4.16915	4.30199	4.49401	3.99043	4.53705	4.53622	4.24711	4.25755	10.5237	11.0129	10.864	4.29264
Nd	18	38.2047	37.0456	19.958	18.6762	18.2465	19.08	18.8214	19.1591	20.2417	17.839	20.3725	20.362	18.9124	18.952	42.206	44.6356	43.9808	19.2728					41	48	39	62	87	80	57	96	63	66	88								64	64	64	71	44	175	85
Sm	5.11	8.48241	8.40069	5.60548	5.35071	5.1026	5.45771	5.26201	5.53201	5.72671	5.11833	5.72057	5.76311	5.329	5.41062	9.20076	9.80316	9.63995	5.48982
Eu	1.86	2.84164	2.77342	2.09296	2.00546	1.88689	2.04958	1.9815	2.08693	2.12628	1.94405	2.16093	2.13187	2.00587	2.00543	2.99753	3.14053	3.11191	2.01535
Gd		7.48237	7.61279	6.11715	5.93248	5.4461	5.84946	5.69692	5.92078	6.23664	5.53617	6.28532	6.17	5.83908	5.82412	8.00514	8.60244	8.33258	6.05949
Tb	0.83	1.08492	1.08542	0.971992	0.9403	0.875526	0.946004	0.915218	0.967575	0.983939	0.899419	0.992333	0.996686	0.93477	0.930241	1.11446	1.20272	1.16275	0.945979
Dy		5.82532	5.76018	5.65666	5.39695	4.907	5.36742	5.28619	5.39964	5.65149	5.13024	5.64993	5.78891	5.41364	5.39296	5.65736	6.15514	5.88761	5.43725
Ho		1.03667	1.05288	1.06097	1.02527	0.926193	1.0132	0.971641	0.998066	1.05376	0.962363	1.06695	1.08036	1.02458	0.999988	0.962559	1.03326	1.02158	1.0116
Er		2.43009	2.407	2.60623	2.47014	2.28922	2.44381	2.39058	2.48649	2.57406	2.31573	2.58916	2.59716	2.45456	2.42723	2.16235	2.34039	2.1987	2.48328
Tm		0.307939	0.307299	0.336826	0.326592	0.298735	0.331851	0.318551	0.32747	0.344982	0.312386	0.349447	0.343845	0.32861	0.324375	0.270899	0.302004	0.278133	0.328902
Yb	1.85	1.74586	1.67482	1.93359	1.87006	1.72902	1.8582	1.81948	1.90541	1.96623	1.77075	1.99685	2.02368	1.84652	1.8846	1.41167	1.57997	1.48662	1.9109
Lu	0.25	0.247193	0.250834	0.288767	0.278576	0.250379	0.279187	0.268124	0.280065	0.292775	0.261506	0.296428	0.289306	0.276833	0.274793	0.203049	0.220933	0.211117	0.281112
Hf	3.43	5.3696	5.11607	3.5524	3.37769	3.19295	3.44863	3.33212	3.38823	3.63381	3.26454	3.65019	3.65148	3.40637	3.41544	6.29286	6.59531	6.61948	3.50424
Ta	1.69	4.2072	4.12091	1.63541	1.54974	1.5151	1.57889	1.53706	1.55764	1.67334	1.47734	1.68086	1.673	1.52945	1.54638	4.88367	5.17283	5.21262	1.5829
Pb	11	0.899386	4.19917	1.33817	1.23152	1.62496	1.2107	1.17229	1.26399	1.36906	1.15	1.29861	1.41771	1.27085	1.23994	4.69357	4.37434	4.09288	1.25202					11	13	11	16	17	31.5	5.66667	21	15	17	19	7	9	8	8	9	9	10	19	19	18	17	25	33	35	11
Th	1.88	5.45104	5.22639	2.06603	1.89353	1.98455	1.82563	1.79118	1.87618	1.9487	1.69085	1.98486	2.00806	1.88672	1.93277	6.52627	6.5387	6.82763	2.02756	5	9			6	9	3	12	25	34.5	5.33333	24	8	10	22	16	14	14	13	13	14	15	15	19	17	19	18	48	18	18
U	0.6	1.42143	1.37224	0.541526	0.499552	0.468956	0.364963	0.337468	0.41669	0.45526	0.259285	0.433671	0.454198	0.402249	0.402194	1.861	1.79632	1.97677	0.449849	4			2					4.33333	6						4	4	3	3	3	3	4					4			4
Isotopes
87Sr/86Srm	0.703087	0.702891	0.702855	0.703063	0.703112	0.703012	0.703071	0.703061	0.703032	0.703042	0.703079	0.703088	0.703065	0.703054	0.703104	0.703995	0.703819	0.704125	0.703101			0.703106	0.703338
87Sr/86Sri **	0.703085	-	-	-	-	-	-	-	-	-	-	-	-	-	-	-	-	-	-			0.703102	-
143Nd/144Ndm		0.512933	0.51295	0.512936	0.512946	0.512932	0.512944	0.512925	0.512929	0.512947	0.512935	0.512939	0.512944	0.512937	0.512938	0.512889	0.512923	0.512908	0.512933			0.512948	0.512859
206Pb/204Pbm		19.5188	19.6131	19.2507	19.2247	19.2677	19.2326	19.2396	19.2453	19.246	19.2219	19.252	19.2536	19.2446	19.2454	19.0572	19.0433	19.1626	19.2395			19.224	19.054
207Pb/204Pbm		15.6303	15.6568	15.6245	15.6176	15.6327	15.615	15.6199	15.6187	15.6197	15.6147	15.6239	15.6266	15.6193	15.6188	15.649	15.6589	15.6512	15.6156			15.607	15.58
208Pb/204Pbm		38.9199	39.0088	38.7143	38.6946	38.7355	38.691	38.705	38.7094	38.7102	38.6863	38.7275	38.7346	38.7108	38.708	38.7271	38.7137	38.6293	38.6963			38.595	38.489
176Hf/177Hfm
References for geochemical & isotopic data
major elements	1	2	2	2	2	2	2	2	2	2	2	2	2	2	2	2	2	2	2	3	3	3	3	6	6	6	6	6	6	6	6	6	6	6	6	6	6	6	6	6	6	6	6	6	6	6	6	6	6
trace elements	1	2	2	2	2	2	2	2	2	2	2	2	2	2	2	2	2	2	2	3	3	3	3	6	6	6	6	6	6	6	6	6	6	6	6	6	6	6	6	6	6	6	6	6	6	6	6	6	6
isotopes	-	2	2	2	2	2	2	2	2	2	2	2	2	2	2	2	2	2	2	-	-	4	4	-	-	-	-	-	-	-	-	-	-	-	-	-	-	-	-	-	-	-	-	-	-	-	-	-	-
*K-Ar and 40Ar/39Ar methods. Refer to Wilch et al. (this volume and references therein).
‡ latitudes & longitudes (decimal degree) were obtained using Google Earth Pro and represent an estimate of the spatial average of each volcanic center or volcanic field, i.e. they do not represent the location of individual samples.
** Refer to the text under section "Sample and data description" for details.
Data Sources:
1 - Unpublished Data (excluding thesis and dissertations)
2 - Gaffney, A. M. and Siddoway, C. S. 2007. Heterogeneous sources for Pleistocene lavas of Marie Byrd Land, Antarctica: new data from the SW Pacific diffuse alkaline magmatic province. In: Cooper, A. K. and Raymond, R. C., et al. (Eds), Antarctica: A Keystone in a Changing World, Proceedings of the 10th International Symposium on Antarctic Earth Sciences. U.S. Geological Survey Open-File Report …
3 - LeMasurier, W. E. and Wade, F. A. 1990. B.16E. Fosdick Mountains. In: LeMasurier, W.E. and Thomson, J. W. (Eds.) Volcanoes of the Antarctic plate and southern oceans. American Geophysical Union, Antarctic Research Series 48, 251-252.
4 - Hart, S. R., Blusztajn, J., LeMasurier, W.E. and Rex, D.C. 1997. Hobbs Coast Cenozoic volcanism: Implications for the West Antarctic rift system. Chemical Geology 139, 223-248.
5 - LeMasurier, W. E. 1990g. B.16D. Pliocene-Pleistocene Hobbs Coast Volcanoes. In: LeMasurier, W.E. and Thomson, J.W. (Eds.) Volcanoes of the Antarctic plate and southern oceans. American Geophysical Union, Antarctic Research Series 48, 248-250.
6 - Wilch, T. I. 1997. Volcanic record of the West Antarctic Ice Sheet in Marie Byrd Land. Ph.D. dissertation, New Mexico Institute of Mining and Technology, Socorro, New Mexico, USA.
7 - LeMasurier, W. E., Choi, S. H., Kawachi, Y., Mukasa, S. B., Rogers, N. W. 2011. Evolution of pantellerite-trachyte-phonolite volcanoes by fractional crystallization of basanite magma in a continental rift setting, Marie Byrd Land, Antarctica. Contributions to Mineralogy and Petrology 162, 1175-1199.
8 - Hart, S. R., Blusztajn, J., LeMasurier, W.E. and Rex, D.C. 1997. Hobbs Coast Cenozoic volcanism: Implications for the West Antarctic rift system. Chemical Geology 139, 223-248.
9 - LeMasurier, W. E. 1990h. B.12. Ames Range. In: LeMasurier, W.E. and Thomson, J.W. (Eds.) Volcanoes of the Antarctic plate and southern oceans. American Geophysical Union, Antarctic Research Series 48, 216-220.
10 - Wilch, T. I. and McIntosh, W. C. 2000. Eocene and Oligocene volcanism at Mount Petras, Marie Byrd Land: implications for middle Cenozoic ice sheet reconstructions in West Antarctica. Antarctic Science 12 (4), 477-491.
11 - Hole, M. J. and LeMasurier, W. E. 1994. Tectonic controls on the geochemical composition of Cenozoic mafic alkaline volcanic rocks from West Antarctica. Contributions to Mineralogy and Petrology 117, 187-202.
12 - LeMasurier, W. E. 1990d. B.16B. Miocene-Oligocene Centers, Mount Petras and the USAS Escarpment. In: LeMasurier, W.E. and Thomson, J.W. (Eds.) Volcanoes of the Antarctic plate and southern oceans. American Geophysical Union, Antarctic Research Series 48, 239-243.
13 - LeMasurier, W. E. 1990b. B.8. Mount Hartigan. In: LeMasurier, W.E. and Thomson, J.W. (Eds.) Volcanoes of the Antarctic plate and southern oceans. American Geophysical Union, Antarctic Research Series 48, 199-202.
14 - Panter, K. S. 1995. Geology, geochemistry and petrogenesis of the Mount Sidley volcano, Marie Byrd Land, Antarctica. Ph.D. dissertation, New Mexico Institute of Mining and Technology, Socorro, New Mexico, USA.
15 - Panter, K. S., Kyle, P. R., Smellie, J. L. 1997. Petrogenesis of a phonolite–trachyte succession at Mount Sidley, Marie Byrd Land, Antarctica. Journal of Petrology 38, 1225–1253.
16 - LeMasurier, W. E., Futa, K., Hole, M., Kawachi, Y. 2003. Polybaric evolution of phonolite, trachyte and rhyolite volcanoes in eastern Marie Byrd Land, Antarctica: controls on peralkalinity and silica saturation. International Geology Review 45, 1055-1099.
17 - Wilch, T. I., McIntosh, W. C. and Dunbar, N. W. 1999. Late Quaternary volcanic activity in Marie Byrd Land: potential 40Ar/39Ar-dated time horizons in West Antarctica ice and marine cores. Geological Society of America Bulletin 111 (10), 1563-1580.
18 - LeMasurier, W. E., Choi, S. H., Hart, S. R., Mukasa, S. B. and Rogers, N. W. 2016. Reconciling the shadow of a subduction signature with rift geochemistry and tectonic environment in eastern Marie Byrd Land, Antarctica. Lithos 260, 134-153.
19 - LeMasurier, W. E. and Rex, D. C. 1990. B.5. Mount Siple. In: LeMasurier, W. E. and Thomson, J. W. (Eds.) Volcanoes of the Antarctic plate and southern oceans. American Geophysical Union, Antarctic Research Series 48, 185-188.
20 - LeMasurier, W. E. 1990b. B.8. Mount Hartigan. In: LeMasurier, W.E. and Thomson, J.W. (Eds.) Volcanoes of the Antarctic plate and southern oceans. American Geophysical Union, Antarctic Research Series 48, 199-202.
21 - Panter, K. S., Hart, S. R., Kyle, P., Blusztanjn, J. and Wilch, T. 2000. Geochemistry of Late Cenozoic basalts from the Crary Mountains: characterization of mantle sources in Marie Byrd Land, Antarctica. Chemical Geology 165, 215–241.
22 - LeMasurier, W. E. 1990a. B. Marie Byrd Land, Summary. In: LeMasurier, W.E. and Thomson, J. W. (Eds.) Volcanoes of the Antarctic plate and southern oceans. American Geophysical Union, Antarctic Research Series 48, 147-163.
23 - LeMasurier, W. E. 1990f. B.16A. Miocene and Older Centers, Walgreen Coast. In: LeMasurier, W.E. and Thomson, J.W. (Eds.) Volcanoes of the Antarctic plate and southern oceans. American Geophysical Union, Antarctic Research Series 48, 235-238.
24 - LeMasurier, W. E., Choi, S. H., Hart, S. R., Mukasa, S. B. and Rogers, N. W. 2016. Reconciling the shadow of a subduction signature with rift geochemistry and tectonic environment in eastern Marie Byrd Land, Antarctica. Lithos 260, 134-153.
25 - LeMasurier, W. E., Choi, S. H., Kawachi, Y., Mukasa, S. B., Rogers, N. W. 2018. Dual origins for pantellerites and other puzzles, at Mount Takahe volcano, Marie Byrd Land, West Antarctica. Lithos 296-299, 142-162.
26 - Rocchi, S., LeMasurier, W. E. and Di Vincenzo G. 2006. Oligocene to Holocene erosion and glacial history in Marie Byrd Land, West Antarctica, inferred from exhumation of the Dorrel Rock intrusive complex and from volcano morphologies. Geological Society of America Bulletin 118 (7/8), 991-1005.
27 - LeMasurier, W. E. 2013. Shield volcanoes of Marie Byrd Land, West Antarctic rift: oceanic island similarities, continental signature, and tectonic controls. Bulletin of Volcanology 75: 726. Doi: 10.1007/s00445-013-0726-1.
28 - Charkraborty, S. 2007. The geochemical evolution of alkaline magmas from the Crary Mountains, Marie Byrd Land, Antarctica. M.S. thesis, Bowling Green State University, Bowling Green, Ohio, USA, 141 pp.
29 - Rowley, P. D., Laudon, T. S., La Prade, K. E. and LeMasurier, W. E. 1990b. C.9. Hudson Mountains. In: LeMasurier, W.E. and Thomson, J.W. (eds) Volcanoes of the Antarctic plate and southern oceans. American Geophysical Union, Antarctic Research Series 48, 289-293.
30 - Hart, S. R., Blusztajn, J. and Craddock, C. 1995. Cenozoic volcanism in Antarctica; Jones Mountains and Peter I Island. Geochimica et Cosmochimica Acta 59, 3379-3388.
31 - Hole, M. J., Storey, B. C. and LeMasurier, W. E. 1994. Tectonic setting and geochemistry of Miocene alkali basalts from the Jones Mountains, West Antarctica. Antarctic Science 6(1), 85-92.
32 - Palais, J. M., Kyle, P. R., McIntosh, W. C. and Seward, D. 1988. Magmatic and phreatiomagmatic volcanic activity at Mt. Takahe, West Antarctica, based on tephra layers in the Byrd Ice Core and field observations at Mt. Takahe. Journal of Volcanology and Geothermal Research 35, 295-317.
[truncated: 681 more columns]
